# Supplementary material for: Fifteen Years of Wireless Sensors for Balance Assessment in Neurological Disorders
Source: Sensors (Basel). 2020 Jun 7;20(11):3247. doi: 10.3390/s20113247 (PMC7308812; doi:10.3390/s20113247)
Supplement: Supplementary file 1 [file sensors-20-03247-s001.pdf]

**Table S1.** Previous reviews on balance and fall risk assessment through wireless sensors.

| Reference                 | Year | Subjects                                         | Topic                                                                                                                                                 | Study objectives                                                                               | Studies included |
|---------------------------|------|--------------------------------------------------|-------------------------------------------------------------------------------------------------------------------------------------------------------|------------------------------------------------------------------------------------------------|------------------|
| Diaz et al.<br>[1]        | 2020 | OA, PD, MS, AD                                   | Use of wearable technologies in walking, balance and range of motion analysis                                                                         | Design issues, outcome measures, biofeedback, measure of validity, machine learning approaches | 56               |
| Ghislieri et al.<br>[2]   | 2019 | YA, OA, SRC, PD, MS, AS, TBI, DM, CA, ST, and HM | Novel posturographic paradigm for the analysis of the human postural sway through inertial sensors                                                    | Sensors types and placement, test protocols, balance measures, measure of validity             | 47               |
| Pinho et al.<br>[3]       | 2019 | YA and OA                                        | Mobile devices in the assessment of postural balance of healthy subjects                                                                              | Balance protocols, sensors type and positions, mobile apps, outcome measures                   | 9                |
| Pang et al.<br>[4]        | 2019 | YA, OA, PD, and ST                               | Assessment of “near falls”, such as slips, trips, stumbles, missteps, incorrect weight transfer, or temporary loss of balance, using wearable devices | Type of falls, sensors placement, algorithms developed, measure of validity                    | 9                |
| Moral-Munoz et al.<br>[5] | 2018 | N/A                                              | Smartphone applications for the balance assessment                                                                                                    | App quality scores and app subjective quality score                                            | N/A              |
| Sun et al.<br>[6]         | 2018 | MS                                               | Sensing technologies in the assessment of mobility and balance impairments                                                                            | functional assessment protocols, outcome measures, measure of validity and reliability         | 33               |
| Sun et al.<br>[7]         | 2018 | OA                                               | Sensing technology in providing objective fall risk assessment in older adults                                                                        | Sensor placement, Test Protocol, outcome measures, measure of validity                         | 22               |
| Gordt et al.<br>[8]       | 2017 | PD, ST, PN, and OA                               | Meta-analysis of randomized controlled trials on wearable sensors technologies for the assessment of balance and gait training                        | Sensors type and placement, type of feedback, training modalities, outcome measures            | 8                |
| Roeing et al.<br>[9]      | 2017 | YA, OA, PD, and VD                               | Mobile health apps for testing balance as a fall risk factor                                                                                          | Clinical tests, measure of balance, measure of validity, measure of reliability                | 13               |
| Godinho et al.<br>[10]    | 2016 | PD                                               | Wearable, non-wearable and hybrid devices used for the clinical assessment of PD                                                                      | Monitoring technologies, measure of validity, motor disability                                 | 73               |

|                      |      |                            |                                                                                                                |                                                                                                                                             |    |
|----------------------|------|----------------------------|----------------------------------------------------------------------------------------------------------------|---------------------------------------------------------------------------------------------------------------------------------------------|----|
| Ma et al. [11]       | 2016 | YA, ST, OA, PD, DM, SP, AM | Effect of biofeedback systems, with wearable inertial motion sensors and force sensors, on balance performance | Sensors type, sensors location, biofeedback type, outcome measure                                                                           | 17 |
| Hubble et al. [12]   | 2015 | PD                         | Wearable sensors in the estimation of standing balance and walking stability in PD                             | Sensors type, sensors placement, measure of balance and stability, test modality                                                            | 26 |
| Maetzler et al. [13] | 2013 | PD                         | Recent innovations in clinical management by using wearables                                                   | Sensors placement, motor disability, non-motor disability, measure of balance, devices used                                                 | 32 |
| Howcroft et al. [14] | 2013 | OA                         | Fall risk assessment by using wearable inertial-sensor-based systems                                           | Sensor placement, derived parameters used to assess fall risk, fall risk classification method, and fall risk classification model outcomes | 40 |

AD: Alzheimer's Disease; AM: Amputees; AS: Ankle Sprain; CA: Cerebellar Ataxia; DM: Diabetes Mellitus; HM: Haemophilia; MS: Multiple Sclerosis; N/A: Not Applicable; OA: Older Adults; PD: Parkinson's Disease; PN: Peripheral Neuropathy; SP: Subjects with Paraplegia; SRC: patients with Sport-Related Concussions; ST: Stroke; TBI: Traumatic Brain Injury; VD: patients with Vestibular Dysfunction; YA: Young Adults

**Table S2.** Sensor-based balance evaluation in neurological disorders.

| Author/Year                | Participants (mean age $\pm$ SD)                                                                    | Type and location of wearable sensors                            | Other measurement | Experimental setup                               | Main postural measures                                                             | Main findings                                                                                                                                                 | Clinical-behavioural correlations |
|----------------------------|-----------------------------------------------------------------------------------------------------|------------------------------------------------------------------|-------------------|--------------------------------------------------|------------------------------------------------------------------------------------|---------------------------------------------------------------------------------------------------------------------------------------------------------------|-----------------------------------|
| <b>Alzheimer's disease</b> |                                                                                                     |                                                                  |                   |                                                  |                                                                                    |                                                                                                                                                               |                                   |
| Gago et al. (2014) [15]    | 9 AD non-fallers<br>(73.56 $\pm$ 9)<br>11 AD fallers<br>(77.64 $\pm$ 5)<br>16 HS<br>(72.31 $\pm$ 7) | 5 IMU on trunk, legs and thighs                                  | Not performed     | Romberg test on flat and inclined surfaces       | Pitch and roll angles; total and maximal COM displacement; maximal linear velocity | Larger COM displacement in AD fallers than HS when eyes closed on flat surface; lower minimal roll angle in AD than HS when eyes closed on frontward platform | Not significant correlations      |
| Hsu et al. (2014) [16]     | 21 AD<br>(61.48 $\pm$ 5)<br>50 HS<br>(59.86 $\pm$ 5)                                                | 1 inertial sensor (accelerometer + uniaxial gyroscope + biaxial) | Not performed     | Side-by-side, tandem and one-leg upright stance, | Sway speed in AP and ML directions                                                 | Greater ML speed in tandem stance with eyes closed and in one-leg stance                                                                                      | Not performed                     |

|                            |                                                           | gyroscope) on waist                                                      |                            | with eyes open and eyes closed                                                     |                                                                                                                        |                                                                                                                                                             |                                                                              |
|----------------------------|-----------------------------------------------------------|--------------------------------------------------------------------------|----------------------------|------------------------------------------------------------------------------------|------------------------------------------------------------------------------------------------------------------------|-------------------------------------------------------------------------------------------------------------------------------------------------------------|------------------------------------------------------------------------------|
| Gago et al. (2016) [17]    | 9 AD non-fallers (75)<br>11 AD fallers (76)<br>21 HS (71) | 1 IMU on the back (55% of patient's height above the ground)             | Not performed              | Upright stance with virtual unpredictable visual displacements and falling         | COM displacement; sway area and path; RMS acceleration                                                                 | Higher range of acceleration on z-axis, mean and RMS acceleration and average acceleration magnitude in AD fallers than HS                                  | Not performed                                                                |
| <b>Parkinson's disease</b> |                                                           |                                                                          |                            |                                                                                    |                                                                                                                        |                                                                                                                                                             |                                                                              |
| Mancini et al. (2009) [18] | 11 PD (60.3 ± 0.7)<br>12 HS (not specified; age-matched)  | 3 inertial sensors (accelerometer + gyroscope) on C7, L5 and right thigh | Force plate (COP measures) | Taking two steps                                                                   | APAs duration; peak AP and ML acceleration; time-to-peak angular velocity; thigh range of motion                       | Linear correlation between COP and inertial measures; smaller peak ML acceleration and hypometric APAs in ML direction                                      | Not performed                                                                |
| Mancini et al. (2011) [19] | 13 PD (60.4 ± 8)<br>12 HS (60.2 ± 8)                      | 1 inertial sensor (accelerometer + gyroscope) on L5                      | Force plate (COP measures) | Upright stance with eyes open, eyes closed and eyes closed during a cognitive task | RMS of acceleration; mean velocity; F95%; frequency dispersion; jerk                                                   | Larger RMS, mean velocity and jerk in eyes open condition                                                                                                   | Not significant correlations                                                 |
| Mancini et al. (2012) [20] | 17 PD (67.1 ± 7)<br>17 HS (67.9 ± 6)                      | 1 inertial sensor (accelerometer) on L5                                  | Force plate (COP measures) | Upright stance with eyes open                                                      | Jerk; Time-domain (e.g. RMS, mean velocity, sway area) and frequency-domain (e.g. F95%, frequency dispersion) measures | Similar sensitivity of COP and inertial measures; larger size and jerkiness of accelerations; high test-retest reliability of jerk and time-domain measures | Acceleration measures correlated with postural impairment (e.g. PIGD scores) |

**Table S2.** Sensor-based balance evaluation in neurological disorders.

| Author/Year                    | Participants<br>(mean age $\pm$ SD)           | Type and<br>location of<br>wearable sensors                   | Other<br>measureme<br>nt                                           | Experimental<br>setup                                                                      | Main postural<br>measures                                                                                                                                           | Main<br>findings                                                                                                                                                                                                      | Clinical-<br>behavioural<br>correlations |
|--------------------------------|-----------------------------------------------|---------------------------------------------------------------|--------------------------------------------------------------------|--------------------------------------------------------------------------------------------|---------------------------------------------------------------------------------------------------------------------------------------------------------------------|-----------------------------------------------------------------------------------------------------------------------------------------------------------------------------------------------------------------------|------------------------------------------|
| Parkinson's disease            |                                               |                                                               |                                                                    |                                                                                            |                                                                                                                                                                     |                                                                                                                                                                                                                       |                                          |
| Maetzler et al.<br>(2012) [21] | 12 PD (61.5 $\pm$ 2)<br>14 HS (63.9 $\pm$ 2)  | 1 inertial sensor<br>on L3-L4                                 | Not<br>performed                                                   | Upright<br>semitandem stance<br>with eyes open and<br>closed, on firm and<br>foam surfaces | RMS of AP and<br>ML acceleration;<br>mean velocity;<br>F95%; jerk                                                                                                   | Comparable values                                                                                                                                                                                                     | Not performed                            |
| Baston et al.<br>(2014) [22]   | 4 PD (62 $\pm$ 6)<br>7 HS (68 $\pm$ 7)        | 2 inertial sensors<br>on L5 and right<br>shank                | Not<br>performed                                                   | SOT                                                                                        | Covariance index<br>between the trunk<br>and shank;<br>strategy index<br>(hip or ankle<br>strategy); RMS of<br>AP acceleration                                      | Larger time in in-<br>phase pattern<br>reflecting<br>predominant<br>adoption of ankle<br>strategy; poor<br>change of postural<br>strategies; similar<br>RMS values                                                    | Not performed                            |
| Curtze et al.<br>(2016) [23]   | 104 PD (66.5 $\pm$ 6)<br>64 HS (65.4 $\pm$ 6) | 6 inertial sensors<br>on wrists,<br>sternum, L5 and<br>ankles | Not<br>performed                                                   | Instrumented Stand<br>and Walk test<br>OFF and ON state<br>of therapy                      | RMS of AP and<br>ML acceleration,<br>mean velocity,<br>centroidal<br>frequency,<br>frequency<br>dispersion, jerk;<br>APA duration,<br>latency and peak<br>AP and ML | Larger RMS, mean<br>velocity, centroidal<br>frequency and jerk;<br>Dopaminergic<br>therapy increased<br>RMS and mean<br>velocity especially<br>in dyskinetic PD;<br>larger APAs in ON<br>than OFF state of<br>therapy | Not performed                            |
| Mancini et al.<br>(2016) [24]  | 10 PD (67.2 $\pm$ 5)<br>12 HS (68 $\pm$ 6)    | 3 IMUs on L5<br>and shanks                                    | Force plate<br>(COP<br>measures);<br>infrared<br>optical<br>system | Gait initiation trials                                                                     | APAs AP and ML<br>peak; APA<br>duration                                                                                                                             | Linear correlation<br>between inertial,<br>COP and optical<br>measures; smaller<br>APAs measures                                                                                                                      | Not significant<br>correlations          |

|                              |                                  |                                                |                  |                                                  |                                                                         |                                                                                                                                            |                                                                                                                                                                                                       |
|------------------------------|----------------------------------|------------------------------------------------|------------------|--------------------------------------------------|-------------------------------------------------------------------------|--------------------------------------------------------------------------------------------------------------------------------------------|-------------------------------------------------------------------------------------------------------------------------------------------------------------------------------------------------------|
| Baston et al.<br>(2016) [25] | 70 PD (67 ± 6)<br>21 HS (67 ± 6) | 2 inertial sensors<br>on L5 and right<br>shank | Not<br>performed | Upright stance OFF<br>and ON state of<br>therapy | Strategy index<br>(hip or ankle<br>strategy); RMS of<br>AP acceleration | Larger RMS of AP<br>acceleration;<br>more ankle strategy<br>and larger RMS of<br>AP acceleration<br>during OFF than<br>ON state of therapy | Strategy index<br>and RMS values<br>correlated with<br>motor<br>impairment (e.g.<br>UPDRS-III and<br>PIGD scores);<br>strategy index<br>correlated with<br>balance<br>confidence (e.g.<br>ABC scores) |
|------------------------------|----------------------------------|------------------------------------------------|------------------|--------------------------------------------------|-------------------------------------------------------------------------|--------------------------------------------------------------------------------------------------------------------------------------------|-------------------------------------------------------------------------------------------------------------------------------------------------------------------------------------------------------|

**Table S2.** Sensor-based balance evaluation in neurological disorders.

| Author/Year                  | Participants<br>(mean age ± SD)          | Type and location<br>of<br>wearable sensors                                                                                                   | Other<br>measuremen<br>t         | Experimental<br>setup                                                                                              | Main postural<br>measures                                                                                                            | Main<br>findings                                                                                                                                                          | Clinical-<br>behavioural<br>correlations |
|------------------------------|------------------------------------------|-----------------------------------------------------------------------------------------------------------------------------------------------|----------------------------------|--------------------------------------------------------------------------------------------------------------------|--------------------------------------------------------------------------------------------------------------------------------------|---------------------------------------------------------------------------------------------------------------------------------------------------------------------------|------------------------------------------|
| Parkinson's disease          |                                          |                                                                                                                                               |                                  |                                                                                                                    |                                                                                                                                      |                                                                                                                                                                           |                                          |
| Falaki et al.<br>(2016) [26] | 11 PD (69.4 ± 6.3)<br>11 HS (65.3 ± 8.1) | sEMG sensors on<br>10 lower limb<br>muscles, lumbar<br>erector spinae,<br>thoracic erector<br>spinae and rectus<br>abdominis<br>(right-sided) | Force plate<br>(COP<br>measures) | Quiet standing,<br>voluntary sway, fast-<br>sway and load release<br>(self-triggered<br>postural<br>perturbations) | Initiation of APAs;<br>amount of variance<br>4 muscle modes<br>account for; synergy<br>index; anticipatory<br>synergy<br>adjustments | Similar APAs; lower<br>amount of variance 4<br>muscle modes account<br>for; lower synergy<br>index during steady<br>state; reduced<br>anticipatory synergy<br>adjustments | Not performed                            |
| Falaki et al.<br>(2017) [27] | 10 PD (69.4 ± 6.3)<br>No HS              | sEMG sensors on<br>10 lower limb<br>muscles, lumbar<br>erector spinae,                                                                        | Force plate<br>(COP<br>measures) | Quiet standing;<br>voluntary sway, load<br>release, fast-body<br>motion (self-triggered                            | Initiation of APAs;<br>variance in muscle<br>activation; synergy<br>index; anticipatory                                              | Similar APAs OFF and<br>ON state of therapy;<br>larger indices of<br>synergies (e.g.                                                                                      | Not performed                            |



|                              |                                      |                                                                                             |                                  |                                                                                                                            |                                                                                                                                                                                                                |                                                                                                                                                   |                                                                                                              |
|------------------------------|--------------------------------------|---------------------------------------------------------------------------------------------|----------------------------------|----------------------------------------------------------------------------------------------------------------------------|----------------------------------------------------------------------------------------------------------------------------------------------------------------------------------------------------------------|---------------------------------------------------------------------------------------------------------------------------------------------------|--------------------------------------------------------------------------------------------------------------|
| Bonora et al.<br>(2017) [32] | 10 PD (67.2 ± 5)<br>12 HS (68 ± 5)   | 3 IMUs on L5<br>and shins                                                                   | Force plate<br>(COP<br>measures) | 3 gait initiation<br>trials                                                                                                | Amplitude of ML<br>trunk acceleration<br>(APAs); ML<br>angular velocity                                                                                                                                        | COP and COM<br>measures<br>significantly<br>correlated; smaller<br>ML trunk<br>acceleration; longer<br>unloading phase                            | Not performed                                                                                                |
| Chen et al.<br>(2018) [33]   | 23 PD (66.2 ± 8)<br>23 HS (64.2 ± 7) | 1 inertial sensor<br>(accelerometer)<br>on L4-L5                                            | Not<br>performed                 | Upright stance with<br>eyes open and eyes<br>closed, as well as<br>eyes open and eyes<br>closed during a<br>cognitive task | RMS of AP and<br>ML acceleration;<br>AP and ML jerk                                                                                                                                                            | Larger RMS and jerk<br>values with and<br>without eyes open<br>during a cognitive<br>task                                                         | Not performed                                                                                                |
| Lang et al.<br>(2019) [34]   | 31 PD (68 ± 9)<br>13 HS (65 ± 9)     | sEMG sensors on<br>11 lower limb<br>muscles<br>(bilaterally)                                | Infrared<br>optical<br>system    | Multidirectional<br>support surface<br>translation<br>perturbations                                                        | Modulation index<br>(considering<br>medium- and<br>long-latency<br>automatic<br>postural<br>responses)<br>reflecting the<br>ability to<br>appropriately<br>inhibit muscles<br>according to the<br>balance task | Lower muscle<br>modulation across<br>perturbation<br>directions regardless<br>of PD phenotype                                                     | Association of<br>PD, PD severity,<br>balance ability<br>and FAB scores<br>with muscle<br>modulation         |
| <b>Multiple sclerosis</b>    |                                      |                                                                                             |                                  |                                                                                                                            |                                                                                                                                                                                                                |                                                                                                                                                   |                                                                                                              |
| Spain et al.<br>(2012) [35]  | 31 MS (39.8)<br>28 HS (37.4)         | 6 inertial sensors<br>(accelerometer +<br>gyroscope) on<br>shins, wrists,<br>sternum and L5 | Not<br>performed                 | Upright stance with<br>eyes open and eyes<br>closed; timed 25-<br>foot walk; timed<br>up-and-go test                       | RMS of AP and<br>ML acceleration;<br>mean sway<br>velocity; sway<br>frequency; sway<br>jerk; trunk range<br>of motion                                                                                          | Larger sway<br>acceleration<br>amplitude and<br>lower ML<br>normalized jerk in<br>upright stance with<br>eyes closed; greater<br>increase of sway | Sway<br>acceleration<br>amplitude<br>negatively<br>correlated with<br>balance<br>confidence and<br>perceived |

|                          |                          |                                                                                 |               |                                                                   |                                                                              |                                                                                                                             |                                                |
|--------------------------|--------------------------|---------------------------------------------------------------------------------|---------------|-------------------------------------------------------------------|------------------------------------------------------------------------------|-----------------------------------------------------------------------------------------------------------------------------|------------------------------------------------|
|                          |                          |                                                                                 |               |                                                                   |                                                                              | acceleration amplitude with closure of eyes; larger angular trunk range of motion in roll and yaw axes during walking tasks | walking abilities (e.g. ABC and MSWS12 scores) |
| Spain et al. (2014) [36] | 27 MS (41)<br>18 HS (34) | 6 inertial sensors (accelerometer + gyroscope) on shins, wrists, sternum and L5 | Not performed | Upright stance with eyes open and eyes closed; timed 25-foot walk | Sway acceleration amplitude; sway jerk; sway area; trunk yaw range of motion | Larger sway area, trunk yaw range of motion; reduced normalized ML jerk                                                     | Not performed                                  |

**Table S2.** Sensor-based balance evaluation in neurological disorders.

| Author/Year                | Participants (mean age $\pm$ SD)                 | Type and location of wearable sensors                                                                      | Other measurement | Experimental setup                                             | Main postural measures                                                 | Main findings                                                                                                                         | Clinical-behavioural correlations                                                                                                |
|----------------------------|--------------------------------------------------|------------------------------------------------------------------------------------------------------------|-------------------|----------------------------------------------------------------|------------------------------------------------------------------------|---------------------------------------------------------------------------------------------------------------------------------------|----------------------------------------------------------------------------------------------------------------------------------|
| <b>Multiple sclerosis</b>  |                                                  |                                                                                                            |                   |                                                                |                                                                        |                                                                                                                                       |                                                                                                                                  |
| Solomon et al. (2015) [37] | 20 MS (40)<br>20 HS (not specified; age-matched) | 6 inertial sensors (accelerometer + gyroscope + magnetometer) on sternum, lumbar region, wrists and ankles | Not performed     | Upright stance with eyes open and eyes closed, on foam surface | 46 measures of velocity, acceleration, jerk and spectral power of sway | Larger sway path length and range of sway acceleration amplitude in ML direction (independent predictors to differentiate MS from HS) | Range of sway acceleration amplitude correlated with balance confidence and perceived walking abilities (ABC and MSWS-12 scores) |
| Craig et al. (2017) [38]   | 15 MS (48.2 $\pm$ 9)<br>15 HS (47.8 $\pm$ 9)     | 6 inertial sensors (accelerometer + gyroscope +                                                            | Not performed     | Upright stance with eyes open; timed up-and-go test            | Sway jerk, area, RMS, mean velocity, 95%                               | Good to excellent test-retest reliability of considered                                                                               | RMS, range of displacement and mean frequency                                                                                    |

|                                 |                                          |                                                                                                                |                                                                    |                                                                               |                                                                                                                                                         |                                                                                                                                                                          |                                                                                                       |
|---------------------------------|------------------------------------------|----------------------------------------------------------------------------------------------------------------|--------------------------------------------------------------------|-------------------------------------------------------------------------------|---------------------------------------------------------------------------------------------------------------------------------------------------------|--------------------------------------------------------------------------------------------------------------------------------------------------------------------------|-------------------------------------------------------------------------------------------------------|
|                                 |                                          | magnetometer)<br>on sternum, L5,<br>wrists and ankles                                                          |                                                                    |                                                                               | power frequency,<br>frequency<br>dispersion, trunk<br>range of motion<br>and velocity                                                                   | measures (except<br>frequency<br>dispersion)                                                                                                                             | correlated with<br>disability (e.g.<br>EDSS scores)                                                   |
| El-Gohary et al.<br>(2017) [39] | 52 MS (49.5 ± 10)<br>21 HS (49.9 ± 12)   | 3 inertial sensors<br>(accelerometer +<br>gyroscope) on<br>lumbar region<br>and feet                           | Force plate<br>(COP<br>measures);<br>infrared<br>optical<br>system | Push and release<br>test                                                      | Latency of<br>Postural<br>Response; time of<br>first heel strike;<br>time to reach<br>stability; number<br>of steps; step<br>length                     | Measures by means<br>of inertial sensors<br>correlated with<br>laboratory reference<br>measures;<br>longer time and<br>more steps to reach<br>stability                  | Time to Reach<br>Stability and step<br>latency<br>correlated with<br>disability (e.g.<br>EDSS scores) |
| Witchel et al.<br>(2018) [40]   | 17 MS (53.06 ± 11)<br>23 HS (46.13 ± 11) | 3 inertial sensors<br>(accelerometer +<br>gyroscope +<br>magnetometer)<br>on L3 and thighs                     | Not<br>performed                                                   | Timed-up-and-go<br>test (sit-to-stand<br>and stand-to-sit<br>transitions)     | Angular velocity<br>features (area<br>under the curve,<br>absolute peak and<br>absolute mean);<br>normalized mean<br>absolute jerk;<br>speed arc length | Lower thigh pitch<br>angular velocity in<br>sit-to-stand<br>transition; larger roll<br>peak in stand-to-sit<br>transition                                                | Not performed                                                                                         |
| Huisinga et al.<br>(2018) [41]  | 36 MS (45.6 ± 12)<br>20 HS (41.8 ± 11)   | 6 inertial sensors<br>(accelerometer +<br>gyroscope +<br>magnetometer)<br>on sternum, L5,<br>wrists and ankles | Force plate<br>(COP<br>measures)                                   | Upright stance with<br>eyes open and eyes<br>closed; backward<br>perturbation | Coherence of<br>acceleration<br>between trunk<br>and legs                                                                                               | Trunk-leg coherence<br>of acceleration<br>correlated with COP<br>sway area; lower<br>trunk-leg coherence<br>of acceleration at<br>lower frequencies in<br>upright stance | Not performed                                                                                         |

**Table S2.** Sensor-based balance evaluation in neurological disorders.

| Author/Year                   | Participants<br>(mean age $\pm$ SD)                                     | Type and<br>location of<br>wearable sensors                                                                                                                    | Other<br>measureme<br>nt         | Experimental<br>setup                                                             | Main postural<br>measures                                                                                                                                                           | Main<br>findings                                                                                                                                            | Clinical-<br>behavioural<br>correlations                                                                                 |
|-------------------------------|-------------------------------------------------------------------------|----------------------------------------------------------------------------------------------------------------------------------------------------------------|----------------------------------|-----------------------------------------------------------------------------------|-------------------------------------------------------------------------------------------------------------------------------------------------------------------------------------|-------------------------------------------------------------------------------------------------------------------------------------------------------------|--------------------------------------------------------------------------------------------------------------------------|
| <b>Multiple sclerosis</b>     |                                                                         |                                                                                                                                                                |                                  |                                                                                   |                                                                                                                                                                                     |                                                                                                                                                             |                                                                                                                          |
| Sun et al.<br>(2018) [42]     | 39 MS (58 $\pm$ 10)<br>15 HS (57.9 $\pm$ 13)                            | 2 inertial sensors<br>(1 reference<br>accelerometer + 1<br>adhesive sensor<br>patch) on L5                                                                     | Force plate<br>(COP<br>measures) | Upright stance with<br>eyes open and eyes<br>closed, on firm and<br>foam surfaces | RMS of AP and<br>ML acceleration;<br>95% confidence<br>ellipse sway area;<br>sway path length<br>of acceleration<br>trajectory; mean<br>sway velocity;<br>total power; sway<br>jerk | Significant<br>correlation between<br>measurement<br>methods; higher<br>sway area and total<br>power, also<br>depending from<br>disease severity            | Not performed                                                                                                            |
| Arpan et al.<br>(2020) [43]   | 25 MS (51.1 $\pm$ 2)<br>10 HS (47.6 $\pm$ 3)                            | 6 inertial sensors<br>(accelerometer +<br>gyroscope) on<br>low back,<br>sternum, wrists<br>and feet                                                            | Not<br>performed                 | 6-minute walk test                                                                | Maximum-finite-<br>time Lyapunov<br>exponents (local<br>dynamic<br>stability);<br>dynamic stability<br>index; distance-<br>walked index                                             | Similar local<br>dynamic stability<br>until minute 4 of<br>walking; higher<br>median local<br>dynamic instability<br>estimated over time<br>during the test | Change in<br>dynamic stability<br>correlated with<br>change in<br>distance from<br>minute 1 to<br>minute 6 of<br>walking |
| Chitnis et al.<br>(2019) [44] | 25 MS (46.5 $\pm$ 7)<br>divided in 3 three<br>severity cohorts<br>No HS | Cardiac and<br>Activity Monitor,<br>including an on-<br>board IMU, on<br>multiple body<br>locations (upper<br>and lower trunk,<br>wrists, thighs<br>and shins) | Not<br>performed                 | Upright stance                                                                    | Sway distance<br>and displacement<br>in left–right and<br>anterior-posterior<br>directions                                                                                          | Biosensor-derived<br>metrics as reliable<br>tools for disability<br>monitoring in MS<br>with respect to<br>standard clinical<br>evaluation                  | Postural sway<br>measures<br>correlated with<br>MS disability<br>(e.g. EDSS and<br>MS functional<br>composite-4)         |

|                                  |                                                                                                                |                                                                                                 |               |                                               |                                                                          |                                                                                                         |                                                                                           |
|----------------------------------|----------------------------------------------------------------------------------------------------------------|-------------------------------------------------------------------------------------------------|---------------|-----------------------------------------------|--------------------------------------------------------------------------|---------------------------------------------------------------------------------------------------------|-------------------------------------------------------------------------------------------|
| Gera et al.<br>(2020) [45]       | 14 MS with mild ataxia ( $48.6 \pm 11$ )<br>11 MS with moderate ataxia ( $44 \pm 8$ )<br>13 HS ( $49 \pm 13$ ) | 1 inertial sensor (accelerometer + gyroscope + magnetometer) on L5                              | Not performed | Upright stance with eyes open and eyes closed | Sway area; jerk; path length; F95%                                       | Higher sway area, jerk, path length and F95% in MS with moderate ataxia than MS with mild ataxia and HS | Postural sway measures negatively correlated with cerebellar white matter tract integrity |
| <b>Huntington's disease</b>      |                                                                                                                |                                                                                                 |               |                                               |                                                                          |                                                                                                         |                                                                                           |
| Dalton et al.<br>(2013) [46]     | 14 HD ( $51.83 \pm 15$ )<br>10 HS ( $56.40 \pm 11$ )                                                           | 1 inertial sensor (accelerometer) on upper sternum                                              | Not performed | Romberg test with feet together and apart     | RMS of AP and ML acceleration                                            | Higher RMS values                                                                                       | Not performed                                                                             |
| Kegelmeyer et al.<br>(2017) [47] | 41 HD ( $52.20 \pm 11$ )<br>36 HS ( $45.94 \pm 14$ )                                                           | 2 inertial sensors (accelerometer + gyroscope within tablet computers – iPads) on thorax and L5 | Not performed | Sitting, standing and walking                 | Peak angular excursion; total absolute excursion; mean angular excursion | Larger peak and total excursions; abrupt changes in speed and amplitude of movements                    | Not significant correlations                                                              |

**Table S2.** Sensor-based balance evaluation in neurological disorders.

| Author/Year                             | Participants<br>(mean age $\pm$ SD)              | Type and location of wearable sensors                                                     | Other measurement | Experimental setup                                                                                                               | Main postural measures                                                                                                           | Main findings                                                                                                 | Clinical-behavioural correlations                                                                                          |
|-----------------------------------------|--------------------------------------------------|-------------------------------------------------------------------------------------------|-------------------|----------------------------------------------------------------------------------------------------------------------------------|----------------------------------------------------------------------------------------------------------------------------------|---------------------------------------------------------------------------------------------------------------|----------------------------------------------------------------------------------------------------------------------------|
| <b>Cerebellar ataxia</b>                |                                                  |                                                                                           |                   |                                                                                                                                  |                                                                                                                                  |                                                                                                               |                                                                                                                            |
| Van de Warrenburg et al.<br>(2005) [48] | 11 CA ( $49.5 \pm 9$ )<br>11 HS ( $48.5 \pm 8$ ) | 1 sensor (Sway Star system consisting of 2 digital angular-velocity transducers) on L2-L3 | Not performed     | Upright stance with eyes open and eyes closed, on firm and foam surfaces; walking tasks; retropulsion task; “get-up-and-go” task | Peak-to-peak excursions in trunk angular displacement and velocity, as well as trunk sway velocity, in the roll and pitch planes | Larger trunk angular displacement and velocity (pitch > roll plane) in stance, walking and retropulsion tasks | Trunk angular displacement and velocity correlated with motor impairment (e.g., ICARS scores and Tinetti's Mobility Index) |

|                               |                                                                          |                                                                       |                                  |                                                                                   |                                                                                          |                                                                                                                                               |                                                                                                              |
|-------------------------------|--------------------------------------------------------------------------|-----------------------------------------------------------------------|----------------------------------|-----------------------------------------------------------------------------------|------------------------------------------------------------------------------------------|-----------------------------------------------------------------------------------------------------------------------------------------------|--------------------------------------------------------------------------------------------------------------|
| Hejda et al.<br>(2015) [49]   | 10 CA ( $52.2 \pm 12$ )<br>11 HS ( $26.0 \pm 6$ )                        | 1 IMU on L2-L3                                                        | Force plate<br>(COP<br>measures) | Upright stance with<br>eyes open and eyes<br>closed, on firm and<br>foam surfaces | Total sway path<br>length (roll, yaw<br>and pitch<br>excursions)                         | COP and COM<br>measures<br>significantly<br>correlated; larger<br>total sway path<br>length in all<br>conditions                              | Not performed                                                                                                |
| Kutílek et al.<br>(2015) [50] | 10 CA ( $52.2 \pm 12$ )<br>11 HS ( $26.0 \pm 6$ )                        | 3 inertial sensors<br>(gyroscope) on<br>L2-L3 and feet                | Not<br>performed                 | Upright stance with<br>eyes open and eyes<br>closed, on firm and<br>foam surfaces | Area of convex<br>hulls of the<br>trajectories                                           | Larger area of<br>convex hulls in all<br>conditions                                                                                           | Not performed                                                                                                |
| Melecký et al.<br>(2016) [51] | 10 CA ( $52.2 \pm 12$ )<br>11 HS ( $26.0 \pm 6$ )                        | 1 IMU<br>(accelerometer +<br>gyroscope) on<br>L2-L3                   | Force plate<br>(COP<br>measures) | Upright stance with<br>eyes open and eyes<br>closed, on firm and<br>foam surfaces | Convex<br>polyhedron<br>volume                                                           | COP and COM<br>measures<br>significantly<br>correlated; increased<br>convex polyhedron<br>volume in all<br>conditions                         | Not performed                                                                                                |
| Nguyen et al.<br>(2018) [52]  | 34 CA<br>( $47.64 \pm 11$ )<br>22 HS (not<br>specified; age-<br>matched) | 2 inertial sensors<br>(accelerometer)<br>on sternum and<br>upper-back | Not<br>performed                 | Romberg and trunk<br>test                                                         | RMS of<br>acceleration;<br>approximate,<br>sample and fuzzy<br>entropy                   | Greater entropy<br>measures                                                                                                                   | Entropy<br>measures<br>(especially from<br>sternum)<br>strongly<br>correlated with<br>clinical<br>assessment |
| Adamová et al.<br>(2018) [53] | 10 CA ( $52.2 \pm 12$ )<br>11 HS ( $26.0 \pm 6$ )                        | 1 IMU on L2-L3                                                        | Force plate<br>(COP<br>measures) | Upright stance with<br>eyes open and eyes<br>closed, on firm and<br>foam surfaces | Average velocity<br>of the point; total<br>length of the 3-<br>dimensional<br>trajectory | COP and COM<br>measures<br>significantly<br>correlated;<br>higher average<br>velocity and total<br>length only for tasks<br>with foam surface | Not performed                                                                                                |

|                               |                                                      |                                                                      |               |                                                                                      |                              |                                                                                                            |                                                         |
|-------------------------------|------------------------------------------------------|----------------------------------------------------------------------|---------------|--------------------------------------------------------------------------------------|------------------------------|------------------------------------------------------------------------------------------------------------|---------------------------------------------------------|
| Widener et al.<br>(2020) [54] | 10 CA ( $47.2 \pm 6.6$ )<br>10 HS ( $47.8 \pm 8.8$ ) | 6 IMU on lumbar spine, anterior sternum, bilateral ankles and wrists | Not performed | Modified clinical test of sensory interaction on balance, with and without weighting | 95% of the ellipse sway area | Larger sway area during no-weight standing tasks; sway area generally decreased with torso weighting in CA | SARA scores correlated with standing stability measures |
|-------------------------------|------------------------------------------------------|----------------------------------------------------------------------|---------------|--------------------------------------------------------------------------------------|------------------------------|------------------------------------------------------------------------------------------------------------|---------------------------------------------------------|

**Table S2.** Sensor-based balance evaluation in neurological disorders.

| Author/Year                            | Participants<br>(mean age $\pm$ SD)                                                               | Type and<br>location of<br>wearable sensors | Other<br>measureme<br>nt   | Experimental<br>setup                                 | Main postural<br>measures                                                                          | Main<br>findings                                                                                                     | Clinical-<br>behavioural<br>correlations |
|----------------------------------------|---------------------------------------------------------------------------------------------------|---------------------------------------------|----------------------------|-------------------------------------------------------|----------------------------------------------------------------------------------------------------|----------------------------------------------------------------------------------------------------------------------|------------------------------------------|
| <b>Stroke</b>                          |                                                                                                   |                                             |                            |                                                       |                                                                                                    |                                                                                                                      |                                          |
| Perez-Cruzado et al. (2014) [55]       | 4 ST (76.7 $\pm$ 3)<br>No HS                                                                      | 2 inertial sensors on L5-S1 and T7-T8       | Not performed              | Single-leg stance test with eyes open and eyes closed | Displacement and velocity; rotation; flexion/extension inclination                                 | Parameterization of single-leg test in ST; good reliability and validity of inertial sensors                         | Not performed                            |
| Merchan-Baeza et al. (2014) [56]       | 5 ST (76.7)<br>No HS                                                                              | 2 inertial sensors on T7 and L5-S1          | Not performed              | Functional reach test                                 | Maximum angular lumbosacral/thoracic displacement; time, velocity and acceleration of displacement | Parameterization of the functional reach test in ST; excellent reliability and validity of inertial sensors          | Not performed                            |
| Merchan-Baeza et al. (2015) [57]       | 5 ST (72.33 $\pm$ 4)<br>5 HS (73.04 $\pm$ 4)                                                      | 2 inertial sensors on T7 and L5-S1          | Not performed              | Functional reach test                                 | Maximum angular lumbosacral/thoracic displacement; time, velocity and acceleration of displacement | Smaller angular displacement, velocity and acceleration; higher maximum and minimum velocity and acceleration values | Not performed                            |
| Iosa et al. (2016) [58]                | 13 ST (63.85 $\pm$ 10)<br>10 HS (63.70 $\pm$ 8)                                                   | 1 inertial sensor (accelerometer) on L2-L3  | Not performed              | Walking tasks                                         | RMS of trunk acceleration                                                                          | Higher trunk accelerations along the LL axis                                                                         | Not performed                            |
| Rahimzadeh-Khiabani et al. (2017) [59] | 12 ST with low ankle spasticity (74.3 $\pm$ 3)<br>15 ST with high ankle spasticity (61.8 $\pm$ 3) | 1 IMU on lumbar region                      | Force plate (COP measures) | Upright stance with eyes open and eyes closed         | Trunk angle, velocity and velocity frequency amplitude in                                          | Greater trunk roll velocity and velocity frequency amplitude at 3.7 Hz and 4.9 Hz, especially with eyes              | Not performed                            |

|                              |                                        |                                                                                                                  |               |                                                                                                       |                                                          |                                                                                                                |               |
|------------------------------|----------------------------------------|------------------------------------------------------------------------------------------------------------------|---------------|-------------------------------------------------------------------------------------------------------|----------------------------------------------------------|----------------------------------------------------------------------------------------------------------------|---------------|
| No HS                        |                                        |                                                                                                                  |               |                                                                                                       | pitch and roll directions                                | closed, in ST with high ankle spasticity                                                                       |               |
| Belluscio et al. (2018) [60] | 27 ST (66 ± 16)<br>18 HS (57 ± 5)      | 5 inertial sensors (accelerometer + gyroscope) on occipital cranium, sternum, L4-L5 and shins (lateral malleoli) | Not performed | Fukuda stepping test                                                                                  | RMS of AP and ML acceleration                            | Not significant findings                                                                                       | Not performed |
| Hou et al. (2018) [61]       | 10 ST (57.7 ± 13)<br>13 HS (45.6 ± 12) | 1 inertial sensor (accelerometer + gyroscope within a smartphone – HTC 10) on S2                                 | Not performed | 6 standing tasks with eyes open and eyes closed, as well as with different base of support amplitudes | AP and ML acceleration change; X, Y and Z axis body tilt | Higher acceleration values, primarily during standing tasks with visual deprivation and narrow base of support | Not performed |

**Table S2.** Sensor-based balance evaluation in neurological disorders.

| Author/Year                   | Participants (mean age ± SD)        | Type and location of wearable sensors                                                    | Other measurement | Experimental setup                                                                                    | Main postural measures                                                                 | Main findings                                  | Clinical-behavioural correlations                                   |
|-------------------------------|-------------------------------------|------------------------------------------------------------------------------------------|-------------------|-------------------------------------------------------------------------------------------------------|----------------------------------------------------------------------------------------|------------------------------------------------|---------------------------------------------------------------------|
| <b>Stroke</b>                 |                                     |                                                                                          |                   |                                                                                                       |                                                                                        |                                                |                                                                     |
| Hou et al. (2019) [62]        | 8 ST (52.3 ± 10)<br>8 HS (51.5 ± 9) | 1 inertial sensor (accelerometer + gyroscope within a smartphone – ASUS Zenfone 3) on S2 | Not performed     | 6 standing tasks with eyes open and eyes closed, as well as with different base of support amplitudes | AP and ML acceleration change; X, Y and Z axis body tilt (changes in angular velocity) | Greater gyroscope values in all standing tasks | Gyroscope data negatively correlated with Berg balance scale scores |
| <b>Traumatic brain injury</b> |                                     |                                                                                          |                   |                                                                                                       |                                                                                        |                                                |                                                                     |
| Furman et al. (2013) [63]     | 43 TBI (15 ± 1)<br>27 HS (16 ± 1)   | 1 inertial sensor (accelerometer) on pelvis                                              | Not performed     | Side-by-side and tandem upright stance, with eyes open and eyes                                       | Normalized path length of AP acceleration                                              | Not significant findings                       | Not performed                                                       |

|                                   |                                                     |                                                                    |                            |                                                                                  |                                                                                                                  |                                                                                                                                                                         |               |
|-----------------------------------|-----------------------------------------------------|--------------------------------------------------------------------|----------------------------|----------------------------------------------------------------------------------|------------------------------------------------------------------------------------------------------------------|-------------------------------------------------------------------------------------------------------------------------------------------------------------------------|---------------|
| closed, on firm and foam surfaces |                                                     |                                                                    |                            |                                                                                  |                                                                                                                  |                                                                                                                                                                         |               |
| King et al. (2014) [64]           | 13 TBI ( $16.3 \pm 2$ )<br>13 HS ( $16.7 \pm 2$ )   | 1 inertial sensor (accelerometer) on L5                            | Not performed              | Balance error scoring system (standard and modified version)                     | RMS of AP and ML acceleration                                                                                    | Higher RMS of AP and ML acceleration; instrumented scale more accurate than standard clinical scale in TBI identification                                               | Not performed |
| King et al. (2017) [65]           | 52 TBI ( $20.36 \pm 1$ )<br>76 HS ( $20.64 \pm 1$ ) | 1 inertial sensor (accelerometer + gyroscope + magnetometer) on L5 | Not performed              | Modified balance error scoring system                                            | 132 sway metrics reflecting postural sway amplitude, velocity, variability and frequency in AP and ML directions | Higher RMS, total power, mean distance, range of acceleration and path length in ML direction, ellipse sway area, total sway area, 95% circle sway area (main measures) | Not performed |
| Doherty et al. (2017) [66]        | 15 TBI ( $21.83 \pm 3$ )<br>15 HS ( $22.46 \pm 4$ ) | 1 inertial sensor (accelerometer + gyroscope) on pelvis            | Force plate (COP measures) | Bilateral, tandem and unilateral stance variants of balance error scoring system | 95% ellipsoid volume of sway                                                                                     | Higher sway volume in bilateral stance (in accordance with increased sway area measured by force plate)                                                                 | Not performed |

**Table S2.** Sensor-based balance evaluation in neurological disorders.

| Author/Year                     | Participants<br>(mean age $\pm$ SD)                 | Type and<br>location of<br>wearable sensors                                                         | Other<br>measureme<br>nt         | Experimental<br>setup                                                                                                                                       | Main postural<br>measures                                                          | Main<br>findings                                                                                                                                                | Clinical-<br>behavioural<br>correlations                                                                                 |
|---------------------------------|-----------------------------------------------------|-----------------------------------------------------------------------------------------------------|----------------------------------|-------------------------------------------------------------------------------------------------------------------------------------------------------------|------------------------------------------------------------------------------------|-----------------------------------------------------------------------------------------------------------------------------------------------------------------|--------------------------------------------------------------------------------------------------------------------------|
| <b>Traumatic brain injury</b>   |                                                     |                                                                                                     |                                  |                                                                                                                                                             |                                                                                    |                                                                                                                                                                 |                                                                                                                          |
| Alkathiry et al.<br>(2018) [67] | 56 TBI ( $15 \pm 1$ )<br>No HS                      | 1 inertial sensor<br>(accelerometer)<br>on lower back                                               | Not<br>performed                 | Side-by-side and<br>tandem upright<br>stance, with eyes<br>open and eyes<br>closed, on firm and<br>foam surfaces<br>("balance<br>accelerometer<br>measure") | Normalized path<br>length of AP<br>sway                                            | Greater normalized<br>AP path length with<br>eyes closed than<br>eyes open, foam<br>surface than firm<br>surface, tandem<br>stance than side-by-<br>side stance | Self-reported<br>symptoms (e.g.<br>dizziness,<br>headache)<br>correlated with<br>normalized path<br>length of AP<br>sway |
| Baracks et al.<br>(2018) [68]   | 48 TBI ( $20.62 \pm 2$ )<br>45 HS ( $20.85 \pm 1$ ) | 1 inertial sensor<br>(accelerometer +<br>gyroscope +<br>magnetometer)<br>on L4-L5                   | Not<br>performed                 | Bilateral, tandem<br>and unilateral<br>stance variants of<br>balance error<br>scoring system                                                                | RMS sway; 95%<br>ellipse sway area                                                 | Higher RMS sway<br>and 95% ellipse<br>sway area in all<br>stance conditions                                                                                     | Not performed                                                                                                            |
| Gera et al.<br>(2018) [69]      | 38 TBI ( $20.6 \pm 1$ )<br>81 HS ( $21.0 \pm 1$ )   | 1 inertial sensor<br>(accelerometer +<br>gyroscope +<br>magnetometer)<br>on L5                      | Not<br>performed                 | Upright stance with<br>eyes open and eyes<br>closed, on firm and<br>foam surfaces                                                                           | Postural sway<br>area                                                              | Larger total sway<br>area (all conditions<br>except upright<br>stance with eyes<br>open on foam<br>surface)                                                     | Postural sway<br>area correlated<br>with self-<br>reported<br>dizziness                                                  |
| <b>Neuropathies</b>             |                                                     |                                                                                                     |                                  |                                                                                                                                                             |                                                                                    |                                                                                                                                                                 |                                                                                                                          |
| Najafi et al.<br>(2010) [70]    | 17 DPN ( $59.2 \pm 8$ )<br>21 HS ( $24.4 \pm 2$ )   | 2 inertial sensors<br>(accelerometer +<br>gyroscope +<br>magnetometer)<br>on lower back<br>and shin | Force plate<br>(COP<br>measures) | Romberg test, on<br>firm and foam<br>surfaces                                                                                                               | Area of COM<br>sway; ankle and<br>hip sway;<br>reciprocal<br>compensatory<br>index | COP and COM<br>measures were<br>correlated; Larger<br>area of COM sway;<br>higher ankle and hip<br>sway with eyes<br>closed; higher<br>reciprocal index         | Not performed                                                                                                            |

|                                  |                                        |                                                                                   |                  |                                                                                                                                             |                                                                                                                                                     |                                                                                                                                                                                                                                             |                                                                                                                  |
|----------------------------------|----------------------------------------|-----------------------------------------------------------------------------------|------------------|---------------------------------------------------------------------------------------------------------------------------------------------|-----------------------------------------------------------------------------------------------------------------------------------------------------|---------------------------------------------------------------------------------------------------------------------------------------------------------------------------------------------------------------------------------------------|------------------------------------------------------------------------------------------------------------------|
| Toosizadeh et al.<br>(2015) [71] | 18 DPN (65 ± 8)<br>18 HS (69 ± 3)      | 2 inertial sensors<br>(accelerometer +<br>gyroscope) on<br>lower back and<br>shin | Not<br>performed | Romberg test                                                                                                                                | Range of AP and<br>ML sway; rate of<br>body sway in<br>short time-<br>intervals (local-<br>control) and long<br>time-intervals<br>(central control) | Higher body sway;<br>higher local-control<br>rate of body sway                                                                                                                                                                              | Vibration<br>perception<br>threshold<br>negatively<br>correlated with<br>central-control<br>rate of body<br>sway |
| D'Silva et al.<br>(2017) [72]    | 14 DPN (57.4 ± 5)<br>14 HS (58.07 ± 5) | 1 IMU on L3                                                                       | Not<br>performed | Upright stance with<br>eyes open and eyes<br>closed, on firm and<br>foam surfaces;<br>tandem<br>stance with eyes<br>open on firm<br>surface | Range of AP and<br>ML acceleration;<br>AP and ML peak<br>velocity; RMS of<br>AP and ML<br>acceleration                                              | Higher AP peak<br>velocity, AP and ML<br>acceleration range in<br>tandem stance, as<br>well as in upright<br>stance with eyes<br>closed on foam<br>surface; higher ML<br>peak velocity and<br>RMS of AP<br>acceleration in<br>tandem stance | Range and RMS<br>of AP<br>acceleration<br>correlated with<br>glycated<br>haemoglobin<br>level                    |

**Table S2.** Sensor-based balance evaluation in neurological disorders.

| Author/Year                 | Participants<br>(mean age ± SD)                                                       | Type and<br>location of<br>wearable sensors  | Other<br>measureme<br>nt | Experimental<br>setup                                                                                          | Main postural<br>measures                      | Main<br>findings                                                                                                              | Clinical-<br>behavioural<br>correlations |
|-----------------------------|---------------------------------------------------------------------------------------|----------------------------------------------|--------------------------|----------------------------------------------------------------------------------------------------------------|------------------------------------------------|-------------------------------------------------------------------------------------------------------------------------------|------------------------------------------|
| <b>Vestibular syndromes</b> |                                                                                       |                                              |                          |                                                                                                                |                                                |                                                                                                                               |                                          |
| Cohen et al.<br>(2012) [73] | 21 BPPV<br>(58.8 ± 12)<br>18 AN (55.6 ± 11)<br>27 UW (54.9 ± 18)<br>61 HS (49.6 ± 16) | 1 IMU on the<br>back at the mid-<br>thoracic | Not<br>performed         | Walking tasks (e.g.<br>tandem gait with<br>and without eyes<br>open); shortened<br>functional<br>mobility test | RMS of<br>acceleration and<br>angular velocity | Higher acceleration<br>and angular velocity<br>in the roll and yaw<br>axes during tandem<br>walking with eyes<br>closed in UW | Not performed                            |

|                               |                                                                                         |                                                                                     |                  |                                                                                                                                             |                                                                                                                                  |                                                                                                                                                                                                                                                                                               |                                                                                                         |
|-------------------------------|-----------------------------------------------------------------------------------------|-------------------------------------------------------------------------------------|------------------|---------------------------------------------------------------------------------------------------------------------------------------------|----------------------------------------------------------------------------------------------------------------------------------|-----------------------------------------------------------------------------------------------------------------------------------------------------------------------------------------------------------------------------------------------------------------------------------------------|---------------------------------------------------------------------------------------------------------|
| Kapoula et al.<br>(2013) [74] | 11 BLVF ( $52 \pm 14$ )<br>16 HS ( $31.7 \pm 10$ )                                      | 1 inertial sensor<br>(accelerometer)<br>on L5                                       | Not<br>performed | Upright stance<br>during fixation<br>tasks, eyes open<br>and eyes closed                                                                    | Normalized area;<br>RMS of AP and<br>ML sway and<br>velocity; mean<br>power frequency;<br>quotient of<br>Romberg for<br>measures | Higher quotient of<br>Romberg for surface<br>area, RMS of AP<br>sway and RMS of<br>AP and ML velocity;<br>during far-close-<br>vergence higher<br>surface area, RMS of<br>ML sway and<br>smaller mean power<br>frequency; during<br>convergence smaller<br>surface area for both<br>subgroups | Not performed                                                                                           |
| Kim et al.<br>(2013) [75]     | 17 VN ( $45.6 \pm 12$ )<br>18 HS ( $43.5 \pm 15$ )                                      | 4 inertial sensors<br>(accelerometer +<br>gyroscope) on<br>head, pelvis and<br>legs | Not<br>performed | Modified Romberg<br>test on foam<br>surface                                                                                                 | Signal vector<br>magnitude;<br>angular velocity                                                                                  | Greater signal<br>vector magnitude;<br>bigger group<br>difference with<br>signal vector<br>magnitude than<br>angular velocity, as<br>well as with head<br>sensor than pelvis<br>and legs sensors                                                                                              | Not performed                                                                                           |
| D'Silva et al.<br>(2017) [72] | 13 BPPV<br>( $54.5 \pm 6$ )<br>11 BPPVDM<br>( $57.6 \pm 6$ )<br>14 HS ( $58.07 \pm 5$ ) | 1 IMU on L3                                                                         | Not<br>performed | Upright stance with<br>eyes open and eyes<br>closed, on firm and<br>foam surfaces;<br>tandem<br>stance with eyes<br>open on firm<br>surface | Range of AP and<br>ML acceleration;<br>AP and ML peak<br>velocity; RMS of<br>AP and ML<br>acceleration                           | Higher range of AP-<br>ML acceleration,<br>AP-ML peak<br>velocity and RMS of<br>AP acceleration in<br>BPPVDM than HS<br>(several conditions);<br>higher AP-ML peak<br>velocity in BPPVDM<br>than BPPV (eyes                                                                                   | Range and RMS<br>of AP<br>acceleration<br>correlated with<br>glycated<br>haemoglobin<br>level in BPPVDM |

---

closed, foam  
surface)

---

ABC: Activities-Specific Balance Confidence scale; AN: patients with Acoustic Neuroma; AP: Antero-Posterior; APAs: Anticipatory Postural Adjustments; BLVF: patients with Bilateral Loss of Vestibular Function; BPPV: patients with Benign Paroxysmal Positional Vertigo; BPPVDM: patients with Benign Paroxysmal Positional Vertigo and Diabetes Mellitus; CA: Cerebellar Ataxia; COM: Center Of Mass; COP: Center Of Pressure; DPN: patients with Diabetic Peripheral Neuropathy; F95%: frequency comprising 95% of the signal; EDSS: Expanded Disability Status Scale; FOG: Freezing of Gait; HD: Huntington's Disease; HS: Healthy Subjects; ICARS: International Cooperative Ataxia Rating Scale; IMU: Inertial Measurement Unit; ML: Medio-Lateral; MS: patients with Multiple Sclerosis; MSWS12: 12-Item Multiple Sclerosis Walking Scale; OFF state of therapy: not under dopaminergic therapy; OLS: One-Leg Stance; ON state of therapy: under dopaminergic therapy; PD: patients with Parkinson's Disease; PIGD: Postural Instability Gait Difficulty; RMS: Root Mean Square; SARA: Scale for the Assessment and Rating of Ataxia; sEMG: Surface Electromyography; SOT: Sensory Organization Test; ST: patients with a previous Stroke; TBI: patients with Traumatic Brain Injury; UPDRS-III: Unified Parkinson's Disease Rating Scale – part III; UW: patients with unilateral vestibular weakness; VN: patients with Vestibular Neuritis

## References

1. Díaz, S.; Stephenson, J.B.; Labrador, M.A. Use of wearable sensor technology in gait, balance, and range of motion analysis. *Appl. Sci.* **2020**, *10*, 234.
2. Ghislieri, M.; Gastaldi, L.; Pastorelli, S.; Tadano, S.; Agostini, V. Wearable Inertial Sensors to Assess Standing Balance: A Systematic Review. *Sensors* **2019**, *19*, 4075, doi:10.3390/s19194075.
3. Pinho, A.S.; Salazar, A.P.; Hennig, E.M.; Spessato, B.C.; Domingo, A.; Pagnussat, A.S. Can we rely on mobile devices and other gadgets to assess the postural balance of healthy individuals? A systematic review. *Sensors* **2019**, *19*, 2972, doi:10.3390/s19132972.
4. Pang, I.; Okubo, Y.; Sturnieks, D.; Lord, S.R.; Brodie, M.A. Detection of Near Falls Using Wearable Devices: A Systematic Review. *J. Geriatr. Phys. Ther.* **2019**, *42*, 48–56.
5. Moral-Munoz, J.A.; Esteban-Moreno, B.; Herrera-Viedma, E.; Cobo, M.J.; Pérez, I.J. Smartphone Applications to Perform Body Balance Assessment: A Standardized Review. *J. Med Syst.* **2018**, *42*, 1–8.
6. Sun, R.; McGinnis, R.; Sosnoff, J.J. Novel technology for mobility and balance tracking in patients with multiple sclerosis: A systematic review. *Expert Rev. Neurother.* **2018**, *18*, 887–898.
7. Sun, R.; Sosnoff, J.J. Novel sensing technology in fall risk assessment in older adults: A systematic review. *BMC Geriatr.* **2018**, *18*, 14.
8. Gordt, K.; Gerhardy, T.; Najafi, B.; Schwenk, M. Effects of Wearable Sensor-Based Balance and Gait Training on Balance, Gait, and Functional Performance in Healthy and Patient Populations: A Systematic Review and Meta-Analysis of Randomized Controlled Trials. *Gerontology* **2017**, *64*, 74–89, doi:10.1159/000481454.
9. Roeing, K.L.; Hsieh, K.L.; Sosnoff, J.J. A systematic review of balance and fall risk assessments with mobile phone technology. *Arch. Gerontol. Geriatr.* **2017**, *73*, 222–226.
10. Godinho, C.; Domingos, J.; Cunha, G.; Santos, A.T.; Fernandes, R.M.; Abreu, D.; Gonçalves, N.; Matthews, H.; Isaacs, T.; Duffen, J.; et al. A systematic review of the characteristics and validity of monitoring technologies to assess Parkinson's disease. *J. Neuroeng. Rehabil.* **2016**, *13*, 24, doi:10.1186/s12984-016-0136-7.
11. Ma, C.Z.H.; Wong, D.W.C.; Lam, W.K.; Wan, A.H.P.; Lee, W.C.C. Balance improvement effects of biofeedback systems with state-of-the-art wearable sensors: A systematic review. *Sensors* **2016**, *16*, 434, doi:10.3390/s16040434.
12. Hubble, R.P.; Naughton, G.A.; Silburn, P.A.; Cole, M.H. Wearable sensor use for assessing standing balance and walking stability in people with Parkinson's disease: A systematic review. *PLoS ONE* **2015**, *10*, e0123705, doi:10.1371/journal.pone.0123705.
13. Maetzler, W.; Domingos, J.; Srulijes, K.; Ferreira, J.J.; Bloem, B.R. Quantitative wearable sensors for objective assessment of Parkinson's disease. *Mov. Disord.* **2013**, *28*, 1628–1637.
14. Howcroft, J.; Kofman, J.; Lemaire, E.D. Review of fall risk assessment in geriatric populations using inertial sensors. *J. Neuroeng. Rehabil.* **2013**, *10*, 1–12.
15. Gago, M.F.; Fernandes, V.; Ferreira, J.; Silva, H.; Rocha, L.; Bicho, E.; Sousa, N. Postural Stability Analysis with Inertial Measurement Units in Alzheimer's Disease. *Dement. Geriatr. Cognit. Dis. Extra* **2014**, *4*, 22–30, doi:10.1159/000357472.
16. Hsu, Y.L.; Chung, P.C.J.; Wang, W.H.; Pai, M.C.; Wang, C.Y.; Lin, C.W.; Wu, H.L.; Wang, J.S. Gait and balance analysis for patients with Alzheimer's disease using an inertial-sensor-based wearable instrument. *IEEE J. Biomed. Health Inform.* **2014**, *18*, 1822–1830, doi:10.1109/JBHI.2014.2325413.
17. Gago, M.F.; Yelshyna, D.; Bicho, E.; Silva, H.D.; Rocha, L.; Lurdes Rodrigues, M.; Sousa, N. Compensatory Postural Adjustments in an Oculus Virtual Reality Environment and the Risk of Falling in Alzheimer's Disease. *Dement. Geriatr. Cognit. Dis. Extra* **2016**, *6*, 252–267, doi:10.1159/000447124.
18. Mancini, M.; Zampieri, C.; Carlson-Kuhta, P.; Chiari, L.; Horak, F.B. Anticipatory postural adjustments prior to step initiation are hypometric in untreated Parkinson's disease: An accelerometer-based approach. *Eur. J. Neurol.* **2009**, *16*, 1028–1034, doi:10.1111/j.1468-1331.2009.02641.x.
19. Mancini, M.; Horak, F.B.; Zampieri, C.; Carlson-Kuhta, P.; Nutt, J.G.; Chiari, L. Trunk accelerometry reveals postural instability in untreated Parkinson's disease. *Parkinsonism Relat. Disord.* **2011**, *17*, 557–562, doi:10.1016/j.parkreldis.2011.05.010.
20. Mancini, M.; Salarian, A.; Carlson-Kuhta, P.; Zampieri, C.; King, L.; Chiari, L.; Horak, F.B. ISway: A sensitive, valid and reliable measure of postural control. *J. Neuroeng. Rehabil.* **2012**, *9*, 59, doi:10.1186/1743-0003-9-59.
21. Maetzler, W.; Mancini, M.; Liepelt-Scarfone, I.; Müller, K.; Becker, C.; van Lummel, R.C.; Ainsworth, E.; Hobert, M.; Streffer, J.; Berg, D.; et al. Impaired trunk stability in individuals at high risk for Parkinson's disease. *PLoS ONE* **2012**, *7*, e32240, doi:10.1371/journal.pone.0032240.

22. Baston, C.; Mancini, M.; Schoneburg, B.; Horak, F.; Rocchi, L. Postural strategies assessed with inertial sensors in healthy and parkinsonian subjects. *Gait Posture* **2014**, *40*, 70–75, doi:10.1016/j.gaitpost.2014.02.012.
23. Curtze, C.; Nutt, J.G.; Carlson-Kuhta, P.; Mancini, M.; Horak, F.B. Objective Gait and Balance Impairments Relate to Balance Confidence and Perceived Mobility in People with Parkinson Disease. *Phys. Ther.* **2016**, *96*, 1734–1743, doi:10.2522/ptj.20150662.
24. Mancini, M.; Chiari, L.; Holmstrom, L.; Salarian, A.; Horak, F.B. Validity and reliability of an IMU-based method to detect APAs prior to gait initiation. *Gait Posture* **2016**, *43*, 125–131, doi:10.1016/j.gaitpost.2015.08.015.
25. Baston, C.; Mancini, M.; Rocchi, L.; Horak, F. Effects of Levodopa on Postural Strategies in Parkinson's disease. *Gait Posture* **2016**, *46*, 26–29, doi:10.1016/j.gaitpost.2016.02.009.
26. Falaki, A.; Huang, X.; Lewis, M.M.; Latash, M.L. Impaired Synergic Control of Posture in Parkinson's Patients without Postural Instability. *Gait Posture* **2016**, *44*, 209–215, doi:10.1016/j.gaitpost.2015.12.035.
27. Falaki, A.; Huang, X.; Lewis, M.M.; Latash, M.L. Dopaminergic modulation of multi-muscle synergies in postural tasks performed by patients with Parkinson's disease. *J. Electromyogr. Kinesiol.* **2017**, *33*, 20–26, doi:10.1016/j.jelekin.2017.01.002.
28. De Souza Fortaleza, A.C.; Mancini, M.; Carlson-Kuhta, P.; King, L.A.; Nutt, J.G.; Chagas, E.F.; Freitas, I.F.; Horak, F.B. Dual task interference on postural sway, postural transitions and gait in people with Parkinson's disease and freezing of gait. *Gait Posture* **2017**, *56*, 76–81, doi:10.1016/j.gaitpost.2017.05.006.
29. Ozinga, S.J.; Linder, S.M.; Alberts, J.L. Use of Mobile Device Accelerometry to Enhance Evaluation of Postural Instability in Parkinson Disease. *Arch. Phys. Med. Rehabil.* **2017**, *98*, 649–658, doi:10.1016/j.apmr.2016.08.479.
30. Ozinga, S.J.; Koop, M.M.; Linder, S.M.; Machado, A.G.; Dey, T.; Alberts, J.L. Three-dimensional evaluation of postural stability in Parkinson's disease with mobile technology. *NeuroRehabilitation* **2017**, *41*, 211–218, doi:10.3233/NRE-171473.
31. Bonora, G.; Mancini, M.; Carpinella, I.; Chiari, L.; Ferrarin, M.; Nutt, J.G.; Horak, F.B. Investigation of Anticipatory Postural Adjustments during One-Leg Stance Using Inertial Sensors: Evidence from Subjects with Parkinsonism. *Front. Neurol.* **2017**, *8*, 361, doi:10.3389/fneur.2017.00361.
32. Bonora, G.; Mancini, M.; Carpinella, I.; Chiari, L.; Horak, F.B.; Ferrarin, M. Gait initiation is impaired in subjects with Parkinson's disease in the OFF state: Evidence from the analysis of the anticipatory postural adjustments through wearable inertial sensors. *Gait Posture* **2017**, *51*, 218–221, doi:10.1016/j.gaitpost.2016.10.017.
33. Chen, T.; Fan, Y.; Zhuang, X.; Feng, D.; Chen, Y.; Chan, P.; Du, Y. Postural sway in patients with early Parkinson's disease performing cognitive tasks while standing. *Neurol. Res.* **2018**, *40*, 491–498, doi:10.1080/01616412.2018.1451017.
34. Lang, K.C.; Hackney, M.E.; Ting, L.H.; McKay, J.L. Antagonist muscle activity during reactive balance responses is elevated in Parkinson's disease and in balance impairment. *PLoS ONE* **2019**, *14*, e0211137, doi:10.1371/journal.pone.0211137.
35. Spain, R.I.; St George, R.J.; Salarian, A.; Mancini, M.; Wagner, J.M.; Horak, F.B.; Bourdette, D. Body-worn motion sensors detect balance and gait deficits in people with multiple sclerosis who have normal walking speed. *Gait Posture* **2012**, *35*, 573–578, doi:10.1016/j.gaitpost.2011.11.026.
36. Spain, R.I.; Mancini, M.; Horak, F.B.; Bourdette, D. Body-worn sensors capture variability, but not decline, of gait and balance measures in multiple sclerosis over 18 months. *Gait Posture* **2014**, *39*, 958–964, doi:10.1016/j.gaitpost.2013.12.010.
37. Solomon, A.J.; Jacobs, J.V.; Lomond, K.V.; Henry, S.M. Detection of postural sway abnormalities by wireless inertial sensors in minimally disabled patients with multiple sclerosis: A case-control study. *J. Neuroeng. Rehabil.* **2015**, *12*, 74, doi:10.1186/s12984-015-0066-9.
38. Craig, J.J.; Bruetsch, A.P.; Lynch, S.G.; Horak, F.B.; Huisinga, J.M. Instrumented balance and walking assessments in persons with multiple sclerosis show strong test-retest reliability. *J. Neuroeng. Rehabil.* **2017**, *14*, 43, doi:10.1186/s12984-017-0251-0.
39. El-Gohary, M.; Peterson, D.; Gera, G.; Horak, F.B.; Huisinga, J.M. Validity of the Instrumented Push and Release Test to Quantify Postural Responses in Persons With Multiple Sclerosis. *Arch. Phys. Med. Rehabil.* **2017**, *98*, 1325–1331, doi:10.1016/j.apmr.2017.01.030.

40. Witchel, H.J.; Oberndorfer, C.; Needham, R.; Healy, A.; Westling, C.E.I.; Guppy, J.H.; Bush, J.; Barth, J.; Herberz, C.; Roggen, D.; et al. Thigh-Derived Inertial Sensor Metrics to Assess the Sit-to-Stand and Stand-to-Sit Transitions in the Timed Up and Go (TUG) Task for Quantifying Mobility Impairment in Multiple Sclerosis. *Front. Neurol.* **2018**, *9*, 684, doi:10.3389/fneur.2018.00684.
41. Huisinga, J.; Mancini, M.; Veys, C.; Spain, R.; Horak, F. Coherence analysis of trunk and leg acceleration reveals altered postural sway strategy during standing in persons with multiple sclerosis. *Hum. Mov. Sci.* **2018**, *58*, 330–336, doi:10.1016/j.humov.2017.12.009.
42. Sun, R.; Moon, Y.; McGinnis, R.S.; Seagers, K.; Motl, R.W.; Sheth, N.; Wright, J.A.; Ghaffari, R.; Patel, S.; Sosnoff, J.J. Assessment of Postural Sway in Individuals with Multiple Sclerosis Using a Novel Wearable Inertial Sensor. *Digit. Biomark.* **2018**, *2*, 1–10, doi:10.1159/000485958.
43. Arpan, I.; Fino, P.C.; Fling, B.W.; Horak, F. Local dynamic stability during long-fatiguing walks in people with multiple sclerosis. *Gait Posture* **2020**, *76*, 122–127, doi:10.1016/j.gaitpost.2019.10.032.
44. Chitnis, T.; Glanz, B.I.; Gonzalez, C.; Healy, B.C.; Saraceno, T.J.; Sattarnezhad, N.; Diaz-Cruz, C.; Polgar-Turcsanyi, M.; Tummala, S.; Bakshi, R.; et al. Quantifying neurologic disease using biosensor measurements in-clinic and in free-living settings in multiple sclerosis. *NPJ Digit. Med.* **2019**, *2*, 123, doi:10.1038/s41746-019-0197-7.
45. Gera, G.; Fling, B.W.; Horak, F.B. Cerebellar White Matter Damage Is Associated with Postural Sway Deficits in People with Multiple Sclerosis. *Arch. Phys. Med. Rehabil.* **2020**, *101*, 258–264, doi:10.1016/j.apmr.2019.07.011.
46. Dalton, A.; Khalil, H.; Busse, M.; Rosser, A.; van Deursen, R.; Ólaighin, G. Analysis of gait and balance through a single triaxial accelerometer in presymptomatic and symptomatic Huntington's disease. *Gait Posture* **2013**, *37*, 49–54, doi:10.1016/j.gaitpost.2012.05.028.
47. Kegelmeier, D.A.; Kostyk, S.K.; Fritz, N.E.; Fiumedora, M.M.; Chaudhari, A.; Palettas, M.; Young, G.; Kloos, A.D. Quantitative biomechanical assessment of trunk control in Huntington's disease reveals more impairment in static than dynamic tasks. *J. Neurol. Sci.* **2017**, *376*, 29–34, doi:10.1016/j.jns.2017.02.054.
48. Van de Warrenburg, B.P.C.; Bakker, M.; Kremer, B.P.H.; Bloem, B.R.; Allum, J.H.J. Trunk sway in patients with spinocerebellar ataxia. *Mov. Disord.* **2005**, *20*, 1006–1013, doi:10.1002/mds.20486.
49. Hejda, J.; Cakrt, O.; Socha, V.; Schlenker, J.; Kutilek, P. 3-D trajectory of body sway angles: A technique for quantifying postural stability. *Biocybern. Biomed. Eng.* **2015**, *35*, 185–191, doi:10.1016/j.bbe.2015.02.001.
50. Kutilek, P.; Socha, V.; Čakrt, O.; Svoboda, Z. Assessment of postural stability in patients with cerebellar disease using gyroscope data. *J. Bodyw. Mov. Ther.* **2015**, *19*, 421–428, doi:10.1016/j.jbmt.2014.09.005.
51. Melecky, R.; Socha, V.; Kutilek, P.; Hanakova, L.; Takac, P.; Schlenker, J.; Svoboda, Z. Quantification of Trunk Postural Stability Using Convex Polyhedron of the Time-Series Accelerometer Data. *J. Healthc. Eng.* **2016**, *2016*, doi:10.1155/2016/1621562.
52. Nguyen, N.; Phan, D.; Pathirana, P.N.; Horne, M.; Power, L.; Szmulewicz, D. Quantification of Axial Abnormality Due to Cerebellar Ataxia with Inertial Measurements. *Sensors* **2018**, *18*, 2791, doi:10.3390/s18092791.
53. Adamová, B.; Kutilek, P.; Cakrt, O.; Svoboda, Z.; Viteckova, S.; Smrcka, P. Quantifying postural stability of patients with cerebellar disorder during quiet stance using three-axis accelerometer. *Biomed. Signal Process. Control* **2018**, *40*, 378–384, doi:10.1016/j.bspc.2017.09.025.
54. Widener, G.L.; Conley, N.; Whiteford, S.; Gee, J.; Harrell, A.; Gibson-Horn, C.; Block, V.; Allen, D.D. Changes in standing stability with balance-based torso-weighting with cerebellar ataxia: A pilot study. *Physiother. Res. Int.* **2020**, *25*, e1814, doi:10.1002/pri.1814.
55. Perez-Cruzado, D.; González-Sánchez, M.; Cuesta-Vargas, A.I. Parameterization and reliability of single-leg balance test assessed with inertial sensors in stroke survivors: A cross-sectional study. *Biomed. Eng. Online* **2014**, *13*, 127, doi:10.1186/1475-925X-13-127.
56. Merchán-Baeza, J.A.; González-Sánchez, M.; Cuesta-Vargas, A.I. Reliability in the parameterization of the functional reach test in elderly stroke patients: A pilot study. *Biomed. Res. Int.* **2014**, *2014*, 637671, doi:10.1155/2014/637671.
57. Merchán-Baeza, J.A.; González-Sánchez, M.; Cuesta-Vargas, A.I. Comparison of kinematic variables obtained by inertial sensors among stroke survivors and healthy older adults in the Functional Reach Test: Cross-sectional study. *Biomed. Eng. Online* **2015**, *14*, 49, doi:10.1186/s12938-015-0047-z.
58. Iosa, M.; Bini, F.; Marinozzi, F.; Fusco, A.; Morone, G.; Koch, G.; Martino, C.; Cinnera, A.; Bonni, S.; Paolucci, S. Stability and Harmony of Gait in Patients with Subacute Stroke. *J. Med. Biol. Eng.* **2016**, *36*, 635–643, doi:10.1007/s40846-016-0178-0.

59. Rahimzadeh Khiabani, R.; Mochizuki, G.; Ismail, F.; Boulias, C.; Phadke, C.P.; Gage, W.H. Impact of Spasticity on Balance Control during Quiet Standing in Persons after Stroke. *Stroke Res. Treat.* **2017**, *2017*, 6153714, doi:10.1155/2017/6153714.
60. Belluscio, V.; Bergamini, E.; Iosa, M.; Tramontano, M.; Morone, G.; Vannozzi, G. The iFST: An instrumented version of the Fukuda Stepping Test for balance assessment. *Gait Posture* **2018**, *60*, 203–208, doi:10.1016/j.gaitpost.2017.12.010.
61. Hou, Y.R.; Chiu, Y.L.; Chiang, S.L.; Chen, H.Y.; Sung, W.H. Feasibility of a smartphone-based balance assessment system for subjects with chronic stroke. *Comput. Methods Programs Biomed.* **2018**, *161*, 191–195, doi:10.1016/j.cmpb.2018.04.027.
62. Hou, Y.R.; Chiu, Y.L.; Chiang, S.L.; Chen, H.Y.; Sung, W.H. Development of a Smartphone-Based Balance Assessment System for Subjects with Stroke. *Sensors* **2019**, *20*, 88, doi:10.3390/s20010088.
63. Furman, G.R.; Lin, C.C.; Bellanca, J.L.; Marchetti, G.F.; Collins, M.W.; Whitney, S.L. Comparison of the balance accelerometer measure and balance error scoring system in adolescent concussions in sports. *Am. J. Sports Med.* **2013**, *41*, 1404–1410, doi:10.1177/0363546513484446.
64. King, L.A.; Horak, F.B.; Mancini, M.; Pierce, D.; Priest, K.C.; Chesnutt, J.; Sullivan, P.; Chapman, J.C. Instrumenting the Balance Error Scoring System for use with patients reporting persistent balance problems after mild traumatic brain injury. *Arch. Phys. Med. Rehabil.* **2014**, *95*, 353–359, doi:10.1016/j.apmr.2013.10.015.
65. King, L.A.; Mancini, M.; Fino, P.C.; Chesnutt, J.; Swanson, C.W.; Markwardt, S.; Chapman, J.C. Sensor-Based Balance Measures Outperform Modified Balance Error Scoring System in Identifying Acute Concussion. *Ann. Biomed. Eng.* **2018**, *45*, 2135–2145, doi:10.1007/s10439-017-1856-y.
66. Doherty, C.; Zhao, L.; Ryan, J.; Komaba, Y.; Inomata, A.; Caulfield, B. Quantification of postural control deficits in patients with recent concussion: An inertial-sensor based approach. *Clin. Biomech.* **2017**, *42*, 79–84, doi:10.1016/j.clinbiomech.2017.01.007.
67. Alkathiry, A.A.; Sparto, P.J.; Freund, B.; Whitney, S.L.; Mucha, A.; Furman, J.M.; Collins, M.W.; Kontos, A.P. Using Accelerometers to Record Postural Sway in Adolescents With Concussion: A Cross-Sectional Study. *J. Athl. Train.* **2018**, *53*, 1166–1172, doi:10.4085/1062-6050-518-17.
68. Baracks, J.; Casa, D.J.; Covassin, T.; Sacko, R.; Scarneo, S.E.; Schnyer, D.; Yeargin, S.W.; Neville, C. Acute Sport-Related Concussion Screening for Collegiate Athletes Using an Instrumented Balance Assessment. *J. Athl. Train.* **2018**, *53*, 597–605, doi:10.4085/1062-6050-174-17.
69. Gera, G.; Chesnutt, J.; Mancini, M.; Horak, F.B.; King, L.A. Inertial Sensor-Based Assessment of Central Sensory Integration for Balance After Mild Traumatic Brain Injury. *Mil. Med.* **2018**, *183*, 327–332, doi:10.1093/milmed/usx162.
70. Najafi, B.; Horn, D.; Marclay, S.; Crews, R.T.; Wu, S.; Wrobel, J.S. Assessing postural control and postural control strategy in diabetes patients using innovative and wearable technology. *J. Diabetes Sci. Technol.* **2010**, *4*, 780–791, doi:10.1177/193229681000400403.
71. Toosizadeh, N.; Mohler, J.; Armstrong, D.G.; Talal, T.K.; Najafi, B. The influence of diabetic peripheral neuropathy on local postural muscle and central sensory feedback balance control. *PLoS ONE* **2015**, *10*, e0135255, doi:10.1371/journal.pone.0135255.
72. D'Silva, L.J.; Kluding, P.M.; Whitney, S.L.; Dai, H.; Santos, M. Postural sway in individuals with type 2 diabetes and concurrent benign paroxysmal positional vertigo. *Int. J. Neurosci.* **2017**, *127*, 1065–1073, doi:10.1080/00207454.2017.1317249.
73. Cohen, H.S.; Mulavara, A.P.; Peters, B.T.; Sangi-Haghpeykar, H.; Bloomberg, J.J. Tests of walking balance for screening vestibular disorders. *J. Vestib. Res.* **2012**, *22*, 95–104, doi:10.3233/VES-2012-0443.
74. Kapoula, Z.; Gaertner, C.; Yang, Q.; Denise, P.; Toupet, M. Vergence and Standing Balance in Subjects with Idiopathic Bilateral Loss of Vestibular Function. *PLoS ONE* **2013**, *8*, e66652, doi:10.1371/journal.pone.0066652.
75. Kim, S.C.; Kim, M.J.; Kim, N.; Hwang, J.H.; Han, G.C. Ambulatory balance monitoring using a wireless attachable three-axis accelerometer. *J. Vestib. Res.* **2013**, *23*, 217–225, doi:10.3233/VES-130489.
